# Supplementary material for: An overview of global monitoring systems for the side effects and adverse events associated with medicinal cannabis use: A scoping review using a systematic approach
Source: bioRxiv or medRxiv preprint supplement (doi:10.1101/2024.02.03.24302171), 2024-02-04

**Supplementary 1. Number of Patients newly prescribed Medicinal Cannabis as reported by TGA's Authorised Prescriber Scheme.**

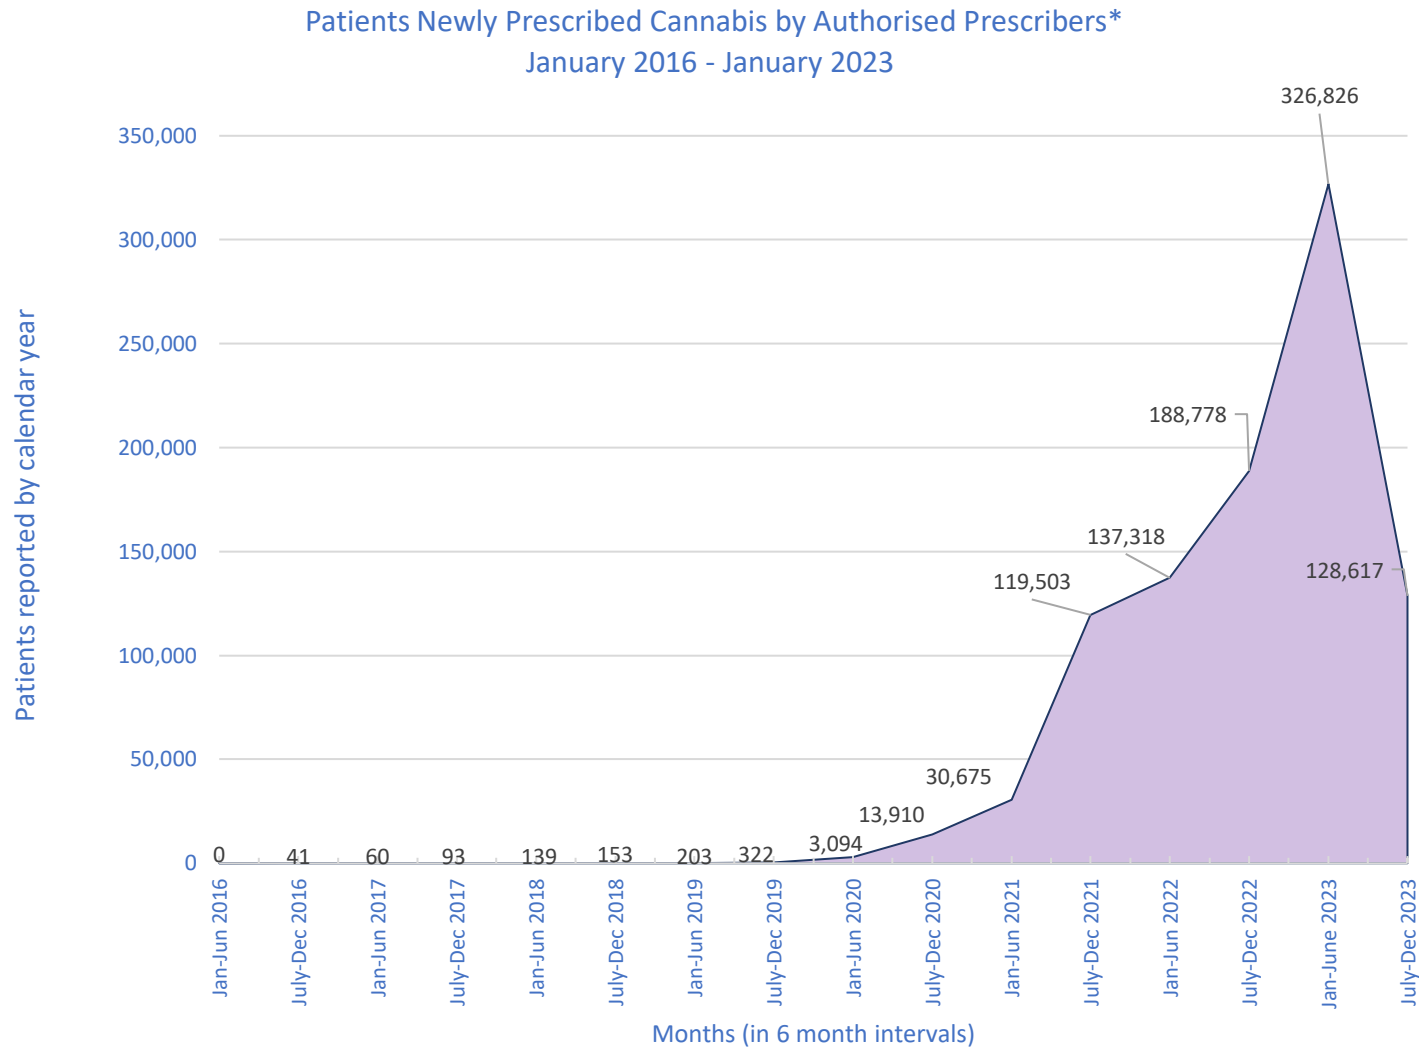

\*Authorised Prescribers – Medical Practitioners approved by a HREC or endorsed by a specialist college to prescribe medicinal cannabis

Source: TGA. Medicinal Cannabis Authorised Prescriber Scheme data. Australian Government Therapeutic Goods Administration (TGA) 2023. Accessed September 07, 2023.

<https://www.tga.gov.au/products/unapproved-therapeutic-goods/medicinal-cannabis-hub/medicinal-cannabis-access-pathways-and-patient-access-data/medicinal-cannabis-authorised-prescriber-scheme-data>

**Supplementary 2. PICO framework with keyword elements, inclusion, and exclusion criteria.**

|                     |                                                                                                                         | Keyword elements                                                                                                              | Inclusion                                                                                                         | Exclusion                                                                                                                                                                                                                        |
|---------------------|-------------------------------------------------------------------------------------------------------------------------|-------------------------------------------------------------------------------------------------------------------------------|-------------------------------------------------------------------------------------------------------------------|----------------------------------------------------------------------------------------------------------------------------------------------------------------------------------------------------------------------------------|
| <b>Population</b>   | Countries allowing therapeutic usage of cannabis, prescribed or otherwise**                                             | <ol style="list-style-type: none"> <li>1. Cannabis and cannabis-based products</li> <li>2. Medical and therapeutic</li> </ol> | Studies reporting on monitoring of cannabis use as a medicine for aforementioned indications.                     | Studies reporting on: <ul style="list-style-type: none"> <li>- Monitoring of recreational cannabis use.</li> <li>- Synthetic Cannabinoid Receptor Agonists</li> </ul>                                                            |
| <b>Intervention</b> | Systems for monitoring of side effects and adverse events                                                               | <ol style="list-style-type: none"> <li>3. Monitoring systems</li> <li>4. Side effects and adverse events</li> </ol>           | Systems for monitoring of side effects and adverse events mentioned as a core component of the title or abstract. | Small scale surveys as a monitoring system<br>Studies relating to addictive potential of medicinal cannabis<br>Studies focusing on monitoring of adverse effects on social wellbeing (marriage, behaviour, academic achievement) |
| <b>Comparison</b>   | No established monitoring system                                                                                        | N/A                                                                                                                           | N/A                                                                                                               | N/A                                                                                                                                                                                                                              |
| <b>Outcome</b>      | Integration of formalized monitoring systems into clinical practice (workflow)                                          | <ol style="list-style-type: none"> <li>5. Pharmacovigilance</li> </ol>                                                        | N/A                                                                                                               | N/A                                                                                                                                                                                                                              |
| <b>Study design</b> | Peer-reviewed systematic reviews, scoping reviews, meta-analyses and narrative reviews, primary papers, grey literature | N/A                                                                                                                           | Papers published from Jan 2015 until June 2023.                                                                   | Papers not published in English.<br>Animal studies<br>Poster presentations<br>Letters to the editor                                                                                                                              |

\*\*Usage for the following indications: Chronic pain, cancer pain, epilepsy, neuropathic pain in MS, AIDS wasting syndrome, chemotherapy-induced nausea and vomiting, sleep disorders/insomnia, psychiatric disorders (PTSD, schizophrenia), inflammatory conditions such as rheumatoid arthritis (RA), Tourette's, irritable bowel syndrome (IBS), Parkinson's disease, dystonia, glaucoma, ADHD, autism.

**Supplementary 3. Categories of searches in search strategy.**

| <b>Category 1 - Cannabis, Medical, Monitoring Systems and Side Effects Keyword Elements</b>                                               |                                                       |                                                                                       |                                                                       |
|-------------------------------------------------------------------------------------------------------------------------------------------|-------------------------------------------------------|---------------------------------------------------------------------------------------|-----------------------------------------------------------------------|
| Cannabis search terms                                                                                                                     | Medical Keyword search terms                          | Monitoring system search terms                                                        | Side Effects and Adverse Events search terms                          |
| Cannabi* OR tetrahydrocannabinol OR THC OR delta9* OR nabiximol* OR dronabinol* or Cannabigerol* OR CBG OR CBN OR marijuana OR marihuana. | Therap* OR medic* OR prescrib* OR prescrip* OR treat* | Surveillance OR post marketing, safety, database, registry, registries, OR monitoring | Side effect* OR adverse effect* OR adverse outcome* OR adverse event* |
| <b>Category 2 - Cannabis, Medical, Monitoring Systems and Pharmacovigilance Keyword Elements</b>                                          |                                                       |                                                                                       |                                                                       |
| Cannabis search terms                                                                                                                     | Medical search terms                                  | Monitoring search terms                                                               | Pharmacovigilance search terms                                        |
| Cannabi* OR tetrahydrocannabinol OR THC OR delta9* OR nabiximol* OR dronabinol* or Cannabigerol* OR CBG OR CBN OR marijuana OR marihuana. | Therap* OR medic* OR prescrib* OR prescrip* OR treat* | Surveillance OR post marketing, safety, database, registry, registries, OR monitoring | Pharmacovigilance                                                     |

## Supplementary 4 Full electronic search strategy for OVID-Embase

### Category 1 search

1. exp postmarketing surveillance/ or exp drug safety/
2. exp pharmacovigilance/ or exp drug surveillance program/
3. exp drug monitoring/
4. ("surveillance" or "post marketing" or "safety" or "database" or "registry" or "registries" or "monitoring").ti,ab,kf.
5. 1 or 2 or 3 or 4
6. exp medical cannabis/ or exp cannabis derivative/ or exp "Cannabis sativa subsp. indica"/ or exp cannabis-induced psychosis/ or exp "Cannabis (genus)"/ or exp cannabis smoking/ or exp cannabis/ or exp "Cannabis sativa subsp. sativa"/ or exp "cannabis use"/
7. cannabino/ or cannabino derivative/ or exp cannabis/ or exp cannabinoid/ or "cannabis (genus)"/ or cannabis addiction/ or cannabis derivative/
8. ("cannabi\*" or "tetrahydrocannabinol" or "THC" or "delta9\*" or "nabiximol" or "dronabinol" or "cannabigerol" or "CBG" or "CBN" or "marijuana" or "marihuana").ti,ab,kf.
9. 6 or 7 or 8
10. exp drug therapy/ or exp therapy/
11. ("therap\*" or "medic\*" or "prescrib\*" or "prescrip\*" or "treat\*").ti,ab,kf.
12. 10 or 11
13. exp side effect/dm, si [Disease Management, Side Effect]
14. exp adverse event/ or exp adverse drug reaction/
15. ("side effect\*" or "adverse effect\*" or "adverse outcome\*" or "adverse event\*").ti,ab,kf.
16. 13 or 14 or 15
17. 5 and 9 and 12 and 16
18. limit 17 to yr="2015 - 2023"

### Category 2 search

1. exp postmarketing surveillance/ or exp drug safety/
2. exp drug surveillance program/ or exp drug monitoring/
3. ("surveillance" or "post marketing" or "safety" or "database" or "registry" or "registries" or "monitoring").ti,ab,kf.
4. 1 or 2 or 3
5. exp pharmacovigilance/
6. pharmacovigilance.ti,ab,kf.
7. 5 or 6
8. exp medical cannabis/ or exp cannabis derivative/ or exp "Cannabis sativa subsp. indica"/ or exp cannabis-induced psychosis/ or exp "Cannabis (genus)"/ or exp cannabis smoking/ or exp cannabis/ or exp "Cannabis sativa subsp. sativa"/ or exp "cannabis use"/
9. cannabino/ or cannabino derivative/ or exp cannabis/ or exp cannabinoid/ or "cannabis (genus)"/ or cannabis addiction/ or cannabis derivative/
10. ("cannabi\*" or "tetrahydrocannabinol" or "THC" or "delta9\*" or "nabiximol" or "dronabinol" or "cannabigerol" or "CBG" or "CBN" or "marijuana" or "marihuana").ti,ab,kf.
11. 8 or 9 or 10
12. exp drug therapy/ or exp therapy/
13. ("therap\*" or "medic\*" or "prescrib\*" or "prescrip\*" or "treat\*").ti,ab,kf.
14. 12 or 13
15. 4 and 7 and 11 and 14
16. limit 15 to yr="2015 - 2023"





**Supplementary 6. Differences between databases and registries.**

| <b>Characteristics</b> | <b>Database</b>                                                                                             | <b>Registry</b>                                                                                                         |
|------------------------|-------------------------------------------------------------------------------------------------------------|-------------------------------------------------------------------------------------------------------------------------|
| <b>Purpose</b>         | Often designed for multiple uses rather than only monitoring therapeutics                                   | Designed with a specific purpose in mind, such as monitoring of effectiveness or safety                                 |
| <b>Data structure</b>  | Includes various data types, such as patient information, clinical trials data, and pharmacological details | Simpler and designed for a specific aim (i.e tracking patient outcomes over time for a specific condition or treatment) |
| <b>Flexibility</b>     | May offer more flexibility, allowing complex queries that can filter several data types                     | Limited querying capabilities tailored to the specific data it collects                                                 |
| <b>Ownership</b>       | Typically owned and created by the same institution                                                         | Owned by a variety of organizations but are often initiated by health agencies, research, or medical organisations      |
| <b>Data Sources</b>    | Multi-purpose, and can include both research and clinical data                                              | Sources data directly from clinicians, patients, or specific clinical studies.                                          |
| <b>Updates</b>         | If not designed for real time monitoring, may not be regularly updated                                      | Regularly updated for longitudinal monitoring                                                                           |
| <b>Scope</b>           | Wider in scope, not limited to a specific therapeutic area or patient population                            | Narrower in scope, focusing on a specific therapy or patient population.                                                |

**Supplementary 7. Reporting hierarchy of side effects and adverse events associated with CBM usage**

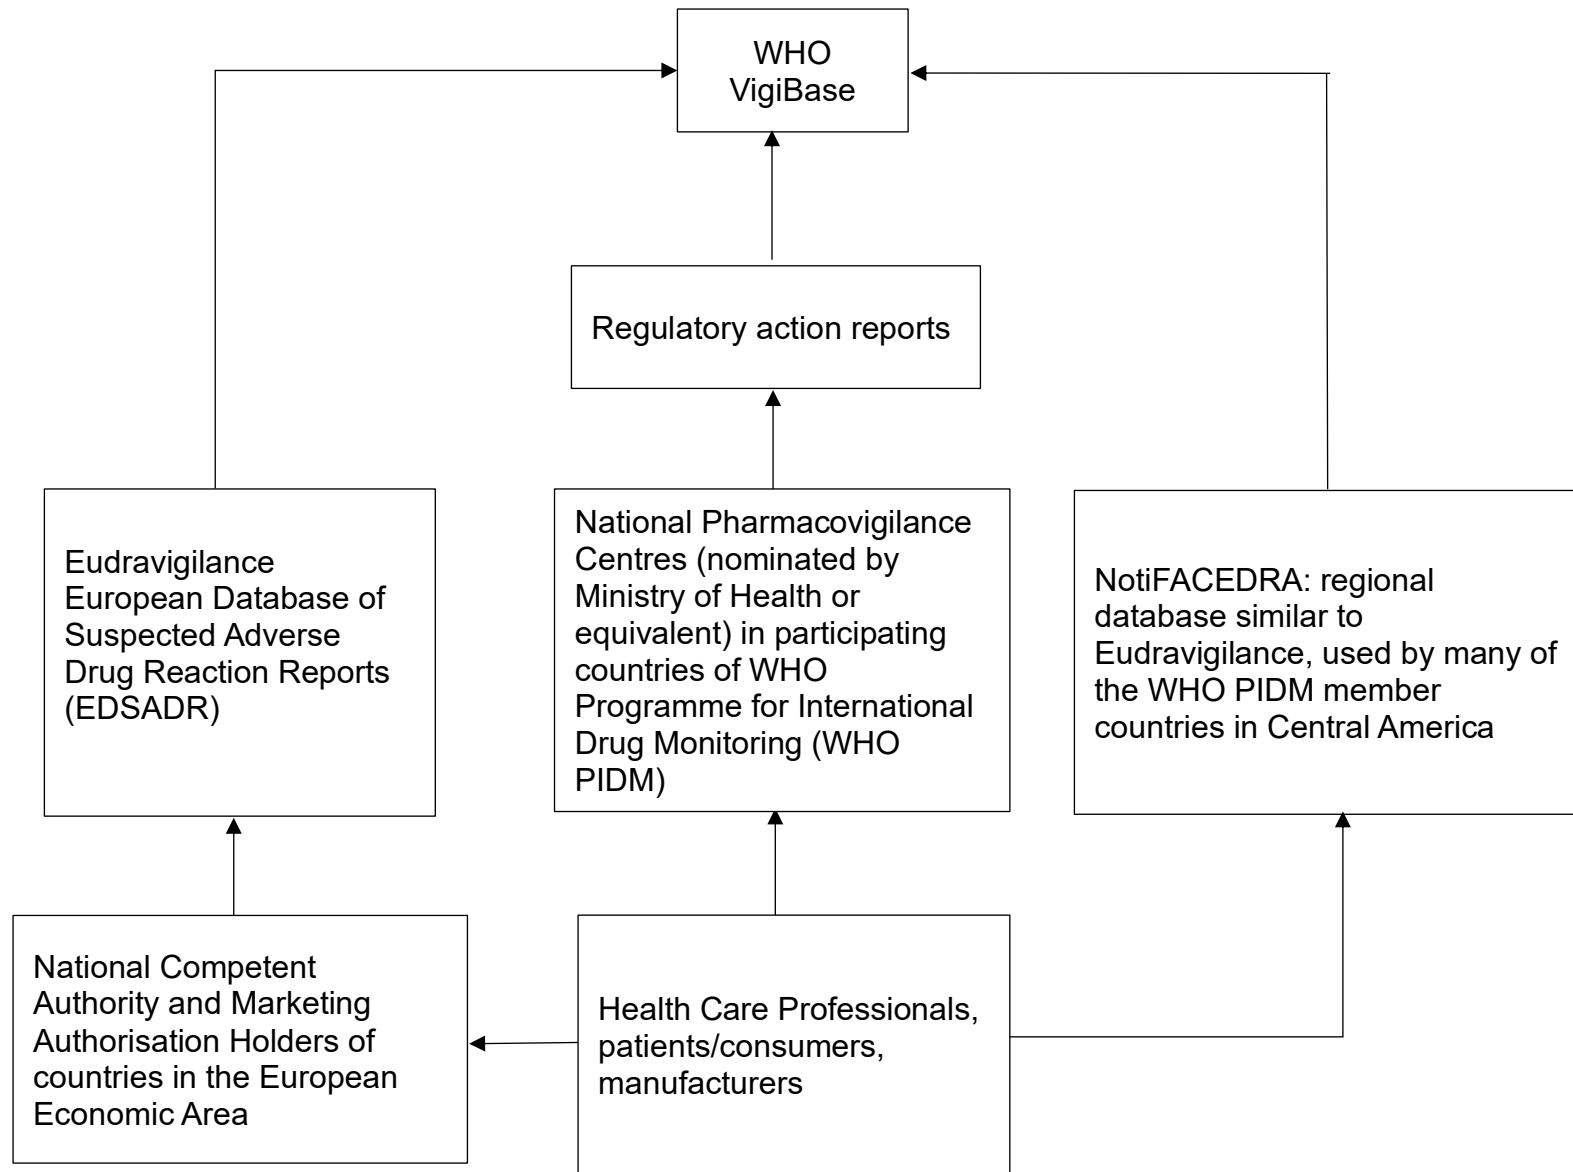

Supplement: Supplementary file [file media-1.pdf]
